# Supplementary material
Source: MDPI journal article supplement (https://www.mdpi.com/1424-2818/14/8/665)
Supplement: s1 [file s1]

## Supplemental File S1. Costa Rica Road Ecology Research References

*The number in brackets following each citation is the citation number in the main article.*

### Journal Articles (11)

- Araya-Gamboa, D.; Salom-Pérez, R. Identificación de sitios de cruce de fauna en la ruta 415, en el “Paso del Jaguar”, Costa Rica. [Identification of fauna crossing sites on the 415 route, in the “Paso del Jaguar”, Costa Rica.] *Revista Infraestructura Vial* **2015**, 17, 5-12. [59]
- Arévalo, J. E.; Honda, W.; Arce-Arias, A.; Häger, A. Spatiotemporal variation of roadkills show mass mortality events for amphibians in a highly trafficked road adjacent to a national park, Costa Rica. *Revista de Biología Tropical* **2017**, 65, 1261-1276. [21]
- Artavia, A.; Jiménez, M.; Martínez-Salinas, A.; Pomareda, E.; Araya-Gamboa, D.; Arévalo-Huezo, E. Registro de mamíferos silvestres en la sección de la ampliación de la Ruta 32, Limón, Costa Rica. [Record of wild mammals in the expanded section of Route 32, Limón, Costa Rica.] *Brenesia* **2015**, 83-84, 37-46. [33]
- Carvajal Alfaro, V.; Díaz Quesada, F. Atropello de mamíferos silvestres en la ruta de acceso al cantón de Liberia, Guanacaste, Costa Rica. [Roadkills of wild mammals on the access road to the canton of Liberia, Guanacaste, Costa Rica.] *Revista Ventana* **2013**, 7, 12-14. [43]
- Carvajal Alfaro, V.; Díaz Quesada, F. Medidas de mitigación para las poblaciones de mamíferos silvestres que sufren atropellos en las carreteras del cantón de la Fortuna. [Mitigation measures for populations of wild mammals that are run over on the roads of the canton of Fortuna.] *Repertorio Científico* **2015**, 18, 5-10. [44]
- Díaz Quesada, F.; Carvajal Alfaro, V. Registro de mamíferos silvestres atropellados y hábitat asociados en el cantón de La Fortuna, San Carlos, Costa Rica. [Roadkill records of wild mammals and associated habitats in the canton of La Fortuna, San Carlos, Costa Rica.] *Biocenosis* **2016**, 30, 49-58. [60]
- Flatt, E.; Basto, A.; Pinto, C.; Ortiz, J.; Navarro, K.; Reed, N.; Brumberg, H.; Chaverri, M. H.; Whitworth, A. Arboreal wildlife bridges in the tropical rainforest of Costa Rica’s Osa Peninsula, *Folia Primatologica* **2022**, 93, 1-17. doi: <https://doi.org/10.1163/14219980-20211109> [61]
- Gómez Figueroa, P.; Monge-Nájera, J. Fauna silvestre víctimas de las carreteras: el case de Costa Rica. [Wildlife victims of the roads: the case of Costa Rica.] *Reportorio Científico* **2000**, 6, 47-50. [62]
- Guzmán, J. P. Correlación entre variables físicas de la carretera y los atropellos de vertebrados silvestres en la Carretera Interamericana Norte, Costa Rica. [Correlation between physical variables of the road and roadkills of wild vertebrates on the North Inter-American Highway, Costa Rica.] *Ecología y Desarrollo Sostenible* **2019**, 1, 1-13. [46]
- Monge-Nájera, J. Vertebrate mortality on tropical highways: The Costa Rica case. *Vida Silvestre Neotropical* **1996**, 5. [63]
- Rojas-Chacón, E. Atropello de vertebrados en una carretera secundaria en Costa Rica. [Roadkills of vertebrates on a secondary road in Costa Rica.] *Cuadernos de Investigación UNED*, 3, 81-84 / *Research Journal of the Costa Rica Distance Education University* **2011**, 3, 81-84. [8]

### Thesis Papers (9)

Araya-Jiménez, Y. Efectividad de estructuras para el paso de fauna silvestre en la Ruta Nacional No 4, Bajos de Chilamate – Vuelta Kooper, Costa Rica. [Effectiveness of wildlife crossing structures on National Route No. 4, Bajos de Chilamate - Vuelta Kooper, Costa Rica.] Bachelor's Thesis, Universidad Latina de Costa Rica, San José, Costa Rica, 2019. [64]

Arévalo-Huezo, E. Evaluación de la mortalidad de fauna silvestre en la Carretera Interamericana Norte, Sección Cañas-Liberia, Guanacaste, Costa Rica. [Evaluation of the mortality of wild fauna in the northern Inter-American Highway, Cañas-Liberia Section, Guanacaste, Costa Rica.] Master's Thesis. Instituto de Conservación y Manejo de Vida Silvestre, Universidad Nacional de Costa Rica, Heredia, Costa Rica, 2015. [65]

Artavia, A. Identificación y caracterización de cruces de fauna silvestre en la sección de la ampliación de la carretera nacional Ruta 32, Limón, Costa Rica. [Identification and characterization of wildlife crossings in the section of the expansion of the Ruta 32 national highway, Limón, Costa Rica.] Maestría en Práctica para la Conservación de la Biodiversidad. Master's Thesis, CATIE - Centro Agronómico Tropical de Investigación y Enseñanza [Tropical Agronomic Center for Research and Teaching], Turrialba, Costa Rica, 2015. [32]

Brenes-Mora, E. Patrones de actividad, selección de hábitat y atropellos de danta (*Tapirus bairdii*) en bosque atravesado por una carretera en la Cordillera de Talamanca, Costa Rica. [Activity patterns, habitat selection and roadkills of tapir (*Tapirus bairdii*) in forest crossed by a highway in the Talamanca Cordillera, Costa Rica.] Master's Thesis, Universidad Nacional, San José, Costa Rica, 2018. [15]

Gutiérrez Sanabria, D. R. Evaluación del riesgo de las carreteras nacionales para la fauna silvestre y el uso de ciencia ciudadana como herramienta para el monitoreo de fauna silvestre atropellada en Costa Rica. [Risk assessment of national highways for wildlife and the use of citizen science as a tool for monitoring roadkill wildlife in Costa Rica.] Thesis for Masters of Science in Conservation and Wildlife Management, National University, Heredia, Costa Rica, 2017. [23]

Monge, M. Herpetofauna atropellada en la Carretera Interamericana Norte, Guanacaste, Costa Rica: Influencia de los atributos del paisaje en las muertes y medidas para su mitigación. [Herpetofauna roadkills on the North Inter-American Highway, Guanacaste, Costa Rica: Influence of landscape attributes on deaths and mitigation measures.] Master's Thesis, Universidad Nacional, Heredia, Costa Rica, 2018. [66]

Rodríguez, G. L. Hacia la construcción de carreteras sostenibles y resilientes. Revisión de los métodos de estudios de pasos de fauna en Costa Rica con proyección a Latinoamérica y el Caribe. [Towards the construction of sustainable and resilient roads. Review of the methods of studies of faunal passages in Costa Rica with projection to Latin America and the Caribbean.] Master's Thesis, Instituto Centroamericano de Administración Pública, San José, Costa Rica, 2018. [67]

Torres, M. L. Funcionalidad de estructuras subterráneas como paso de fauna en la carretera Interamericana Norte que cruza el Área de Conservación Guanacaste, Costa Rica. [Functionality of underground wildlife crossings on the North Inter-American highway crossing the Guanacaste Conservation Area, Costa Rica.] Master's Thesis, CATIE - Centro Agronómico Tropical de Investigación y Enseñanza [Tropical Agronomic Center for Research and Teaching], Turrialba, Costa Rica, 2011. [31]

Venegas, M. Funcionalidad de estructuras subterráneas como pasos de fauna silvestre en el Refugio Nacional de Vida Silvestre Hacienda Barú, Puntarenas, Costa Rica. [Functionality of underground structures as wildlife passages in the Hacienda Barú National Wildlife Refuge, Puntarenas, Costa Rica.] B.Sc. Project Final Report, Universidad Nacional, Heredia, Costa Rica, 2018. [4]

### Technical Reports (6)

Araya-Gamboa, D.; Salom-Pérez, R. Método para la identificación de pasos de fauna sobre la Ruta 415, dentro del Subcorredor Biológico Barbilla-Destierro “Paso del Jaguar”, Costa Rica. [Method for identifying wildlife crossings on Route 415, within the Barbilla-Destierro Biological Corridor “Paso del Jaguar”, Costa Rica.] Caminos Amigables con Animales, San José, Costa Rica, 2013. [68]

Araya-Gamboa, D.; Arévalo-Huezo, E.; Pomareda-García, E. Informe técnico-científico: Medidas ambientales para disminuir el impacto en la fauna silvestre, de la ampliación en la carretera nacional, Ruta 32, Limón, Costa Rica. [Technical-scientific report: Environmental measures to reduce the impact on wildlife from the expansion of the national highway, Route 32, Limón, Costa Rica.] Grupo Vías Amigables con la Vida Silvestre, San José, Costa Rica, 2015. [69]

Carvajal Alfaro, V.; Díaz Quesada, F.; Gallardo, R. Estrategias para la conservación de poblaciones de mamíferos silvestres en rutas turísticas de acceso al cantón de Sarapiquí. Informe Final. [Strategies for the conservation of wild mammal populations on tourist access routes to the Sarapiquí canton. Final report.] Instituto Tecnológico de Costa Rica, Cartago, Costa Rica, 2010. [42]

Monge, F.; Viquez, J.; Fallas, M. Análisis de mortalidad de aves y mamíferos en la carretera, Interamericana sur, limítrofe con el Parque Nacional Los Quetzales. [Mortality analysis of birds and mammals on the highway, South Inter-American, bordering Los Quetzales National Park.] Liceo de Tarrazú, Tarrazú, Costa Rica, 2013. [70]

Panthera. Elaboración de un plan para mejorar la conectividad estructural de ecosistemas boscosos en los campos geotérmicos de Borinquen y Las Pailas, Guanacaste Costa Rica. [Preparation of a plan to improve the structural connectivity of forest ecosystems in the Borinquen and Las Pailas geothermal fields, Guanacaste Costa Rica.] Informe Final. Cartago, Costa Rica, 2018. [71]

Pomareda, E.; Araya-Gamboa, D.; Ríos, Y.; Arévalo, E.; Aguilar, M.; Menacho, R. Guía ambiental “Vías amigables con la vida silvestre”. [Environmental guide "Wildlife-friendly roads".] Comité Científico de la Comisión Vías y Vida Silvestre [Scientific Committee of the Roads & Wildlife Commission], San Jose, Costa Rica, 2014. [25]

### Conference Presentations (1 symposium, 23 presentations)

García-Blanco, S.; Espeja, S.; Romero, M.; Martos, R.; Velasco, H. Proyecto PRASCOSUR: Protejamos los Animales de la Costanera Sur. [Project PRASCOSUR: Protect the Animals of the Costanera Sur.] Poster presented in: Menacho, R. M., & Pomareda, E. Memoria I simposio ecología de caminos: por caminos amigables para la fauna silvestre en Costa Rica. [Report 1 of road ecology symposium: friendly paths for wildlife in Costa Rica.] Universidad Estatal a Distancia, San José, Costa Rica, November 29, 2013. [27]

Menacho, R. M.; Pomareda, E. Memoria I simposio ecología de caminos: por caminos amigables para la fauna silvestre en Costa Rica. [Report 1 of road ecology symposium: friendly paths for wildlife in Costa Rica (22 presentations).] Universidad Estatal a Distancia (UNED), San José, Costa Rica, November 29, 2013. Youtube: <https://youtu.be/0t72UgtRK1A>; Slideshare: <https://www.slideshare.net/roseamena/memoria-final-simposio-ecologia-de-caminos-29-noviembre-2013>. [38]

## News Articles and Media (23)

Arias, L. (2014). Drivers: Slow down and help reduce wildlife deaths on highways, says university study. Tico Times: October 21, 2014. Available online: <https://ticotimes.net/2014/10/21/drivers-slow-down-and-help-reduce-wildlife-deaths-on-highways-says-university-study> (Accessed on 13 August 2022). [72]

Arias, L. (2015). Costa Rica utility company helps protect wildlife along 250 km of power lines. Tico Times: November 23, 2015. Available online: <https://ticotimes.net/2015/11/23/ice-improves-costa-rica-wildlife-protection-along-250-km-of-power-lines> (Accessed on 13 August 2022). [73]

Arias, L. (2015). New traffic signs aim to reduce wildlife deaths on Costa Rica's roads. Tico Times: April 23, 2015. Available online: <https://ticotimes.net/2015/04/23/new-traffic-signs-aims-to-reduce-wildlife-deaths-on-costa-ricas-roads> (Accessed on 13 August 2022). [74]

Bolaños, R. (2019). Decenas de animales mueren al día al cruzar la calle. [Dozens of animals die a day crossing the street.] Boletín de Ciencia y Tecnología, 194, February 2019. Available online: [http://www.conicit.go.cr/prensa/boletincyt/boletines\\_cyt/boletin\\_194/Animales\\_y\\_calle.aspx](http://www.conicit.go.cr/prensa/boletincyt/boletines_cyt/boletin_194/Animales_y_calle.aspx) (Accessed on 13 August 2022). [75]

Brenes-Mora, E. (2017). Tapir crossing signs will prevent collisions with vehicles in Costa Rica. Nai Conservation: September 26, 2017. Available online: <https://naiconservation.org/tapir-crossing-signs-will-prevent-collisions-with-vehicles/> (Accessed on 13 August 2022). [76]

Campaña TV (2021, February 15). Campaña contra el atropello de fauna silvestre en Costa Rica [Campaign against the roadkill of wildlife in Costa Rica]. Youtube page. Available online: [www.youtube.com/playlist?list=PLeIX\\_dGDBCCoS3CTfb-3IHIsBBZ8xPCE5](http://www.youtube.com/playlist?list=PLeIX_dGDBCCoS3CTfb-3IHIsBBZ8xPCE5) (Accessed on 13 August 2022). [40]

Delgado, M. (2019). ¡Sin piedad! Conductores no aprenden y matan fauna en Punta Norte. [Without mercy! Drivers do not learn and kill fauna in Punta Norte.] San Carlos Digital: September 10, 2019. Available online: <https://sancarlosdigital.com/sin-piedad-conductores-no-aprenden-y-matan-fauna-en-punta-norte/> (Accessed on 13 August 2022). [77]

Evitemos Facebook. (2021, February 15). Evitemos atropellar animales silvestres en las carreteras de Costa Rica [Let's avoid hitting wild animals on the roads of Costa Rica]. Facebook page of 'Roads & Wildlife Commission' [Comisión de Vías y Vida Silvestre]. Available online: <https://www.facebook.com/groups/541592915879960> (Accessed on 13 August 2022). [39]

Evitemos Radio. (2021, February 15). Evitemos atropellar animales silvestres en las carreteras de Costa Rica [Let's avoid hitting wild animals on the roads of Costa Rica]. Soundcloud, Audiovisuales Podcast UNED. Available online: <https://soundcloud.com/audiovisualespodcastuned/sets/evitemos-atropellar-animales> (Accessed on 13 August 2022). [41]

Ewing, J. (2012). A bridge to nowhere. Quepolandia: April 30, 2012. Available online: <http://www.quepolandia.com/a-bridge-to-nowhere/> (Accessed on 13 August 2022). [78]

Ewing, J. (2013). How do you help a wild pig cross the road? Quepolandia: August 26, 2013. Available online: <http://www.quepolandia.com/how-do-you-help-a-wild-pig-cross-the-road/> (Accessed on 13 August 2022). [79]

Ewing, J. (2021, February 15). Getting to the other side of the road... animal crossing on Hacienda Barú. Ballena Tales. Available online: <https://www.ballenatales.com/getting-to-the-other-side-of-the-road-animal-crossing-on-hacienda-baru/> (Accessed on 13 August 2022). [80]

- Garza, J. (2016). Proyecto busca poblar carreteras con pasos para animales. [Project seeks to populate roads with animal crossings.] La Republica: August 30, 2016. Available online: [https://www.larepublica.net/noticia/proyecto\\_busca\\_poblar\\_carreteras\\_con\\_pasos\\_para\\_animales](https://www.larepublica.net/noticia/proyecto_busca_poblar_carreteras_con_pasos_para_animales) (Accessed on 13 August 2022). [81]
- Garza, J. (2019). Atropellos y electrocuciones amenazan animales en extinción. [Roadkills and electrocutions threaten endangered animals.] La Republica: June 25, 2019. Available online: <https://www.larepublica.net/noticia/atropellos-y-electrocuciones-amenazan-animales-en-extincion> (Accessed on 13 August 2022). [82]
- González, C. (2019). Pasos de fauna: la estrategia para frenar los atropellos de animales nativos. [Wildlife crossings: the strategy to stop roadkills of native animals.] Pais Circular: July 31, 2019. Available online: <https://www.paiscircular.cl/biodiversidad/pasos-de-fauna-la-estrategia-futura-para-frenar-los-atropellos-de-animales-nativos-en-chile/> (Accessed on 13 August 2022). [83]
- Pena, S. (2021, February 15). Ruta 257 tiene modernos mecanismos para proteger la fauna. [Ruta 257 has modern mechanisms to protect wildlife.] Teletica.com. Available online: [https://www.teletica.com/225864\\_ruta-257-tiene-modernos-mecanismos-para-proteger-la-fauna](https://www.teletica.com/225864_ruta-257-tiene-modernos-mecanismos-para-proteger-la-fauna) (Accessed on 13 August 2022). [84]
- PNUD Costa Rica. (2020). Unidos por la vida silvestre: Pasos amigables para la identidad natural de Costa Rica. [United for wildlife: Wildlife-friendly crossings for Costa Rica's natural identity.] PNUD Costa Rica: March 3, 2020. Available online: <https://pnudcr.exposure.co/guardianas-de-fauna-silvestre> (Accessed on 13 August 2022). [85]
- Rice, J. (2017). The story of the wildlife bridges. Discovery Beach House: December 10, 2017. Available online: <https://discoverybeachhouse.com/the-story-of-the-wildlife-bridges/> (Accessed on 13 August 2022). [86]
- Rico. (2015). New traffic sign to alert animal crossings. Q: April 23, 2015. Available online: <https://qcostarica.com/new-traffic-sign-to-alert-animal-crossings/> (Accessed on 13 August 2022). [87]
- Rojas, P. (2016). Pais en deuda para evitar atropellos de animales. [Country behind in avoiding animal roadkills.] CRHoy Noticias 24/7: August 17, 2016. Available online: <https://www.crhoy.com/ambiente/pais-en-deuda-para-evitar-atropellos-de-animales/> (Accessed on 13 August 2022). [88]
- Soto, M. (2013). Carreteras de Costa Rica urgen de pasos para animales. [Costa Rican roads urgently need animal crossings.] La Nación: October 28, 2019. Available online: <https://www.nacion.com/el-pais/carreteras-de-costarica-urgen-de-pasos-para-animales/47X3JGRYDFAETBR6ZREL3LU2UM/story/> (Accessed on 13 August 2022). [89]
- Soto, M. (2014). Animales si usan los pasos de fauna en tramo de Costanera Sur [Animals use the wildlife crossings in section of Costanera Sur]. La Nación: May 5, 2014. Available online: <https://www.nacion.com/ciencia/medio-ambiente/animales-si-usan-los-pasos-de-fauna-en-tramo-de-costanera-sur/C7STTOUAINAIDBWV7QT5LJMBNI/story/> (Accessed on 13 August 2022). [90]
- Villalobos, W. (2016). More wildlife crossings needed as highway deaths continue. The Voice of Guanacaste: September 5, 2016. Available online: <https://vozdeguanacaste.com/en/more-wildlife-crossings-needed-as-highway-deaths-continue/> (Accessed on 13 August 2022), Costa Rica. 51 pp. [91]
